# Supplementary material for: Easy and fast in situ functionalization of exfoliated 2D black phosphorus with gold nanoparticles
Source: Royal Society of Chemistry journal article supplement (doi:10.1039/d1dt02123k), 2021-01-01
Supplement: d1dt02123k1.pdf [file d1dt02123k1.pdf]

## Easy and fast *in-situ* functionalization of exfoliated 2D black phosphorus with gold nanoparticles

Salvatore Moschetto,<sup>a\*</sup> Andrea Ienco,<sup>b</sup> Gabriele Manca,<sup>b\*</sup> Manuel Serrano-Ruiz,<sup>b</sup> Maurizio Peruzzini,<sup>b</sup> Alessio Mezzi,<sup>c</sup> Marco Brucale,<sup>a</sup> Margherita Bolognesi<sup>a\*</sup> and Stefano Toffanin<sup>a</sup>

<sup>a</sup>National Research Council - Institute for the Study of Nanostructured Materials (CNR-ISMN), Via P. Gobetti, 101, 40129 Bologna, Italy.

<sup>b</sup>National Research Council - Institute for the Chemistry of OrganoMetallic Compounds (CNR-ICCOM), Via Madonna del Piano 10, 50019 Sesto Fiorentino, Italy

<sup>c</sup>National Research Council - Institute for the Study of Nanostructured Materials (CNR-ISMN), Viaalaria km 29.3,00015 Monterotondo Stazione (Rome), Italy

### Supporting Information

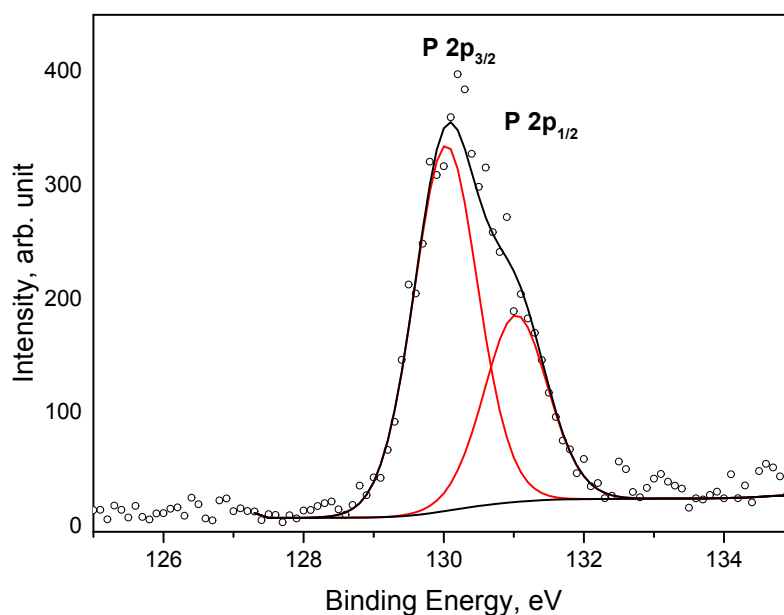

**Figure S1.** XPS spectra of bulk bP on a Si/SiO<sub>2</sub> substrate.

**Table S1.** Binding Energy (BE) and atomic concentration (atomic %), acquired on a bare 2D bP flake.

| Name    | Peak BE | Atomic % | Bond  |
|---------|---------|----------|-------|
| C1s – 1 | 284.9   | 47.6     | C – C |
| C1s – 2 | 286.7   | 5.3      | C – O |

|                    |       |      |                |
|--------------------|-------|------|----------------|
| O1s – 1            | 532.2 | 6.2  | C – O          |
| O1s – 2            | 533.8 | 3.5  |                |
| P2p <sub>3/2</sub> | 130.0 | 37.4 | p <sup>0</sup> |

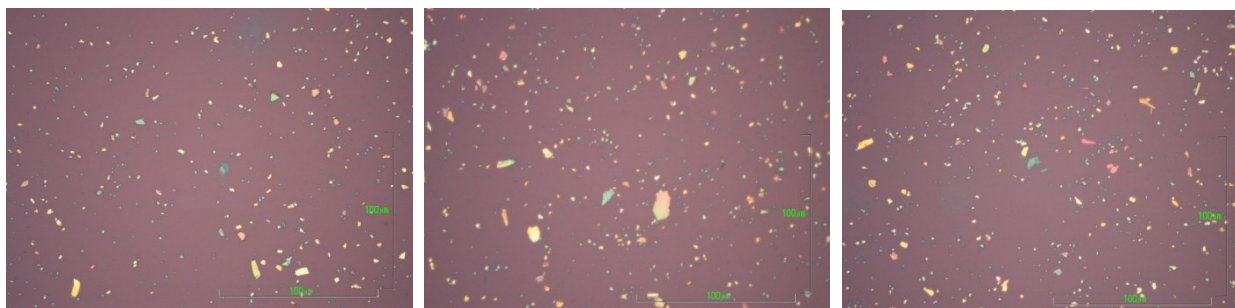

**Figure S2.** Optical microscopy images in different areas of a sample of mechanically exfoliated 2D bP on a Si/SiO<sub>2</sub> substrate.

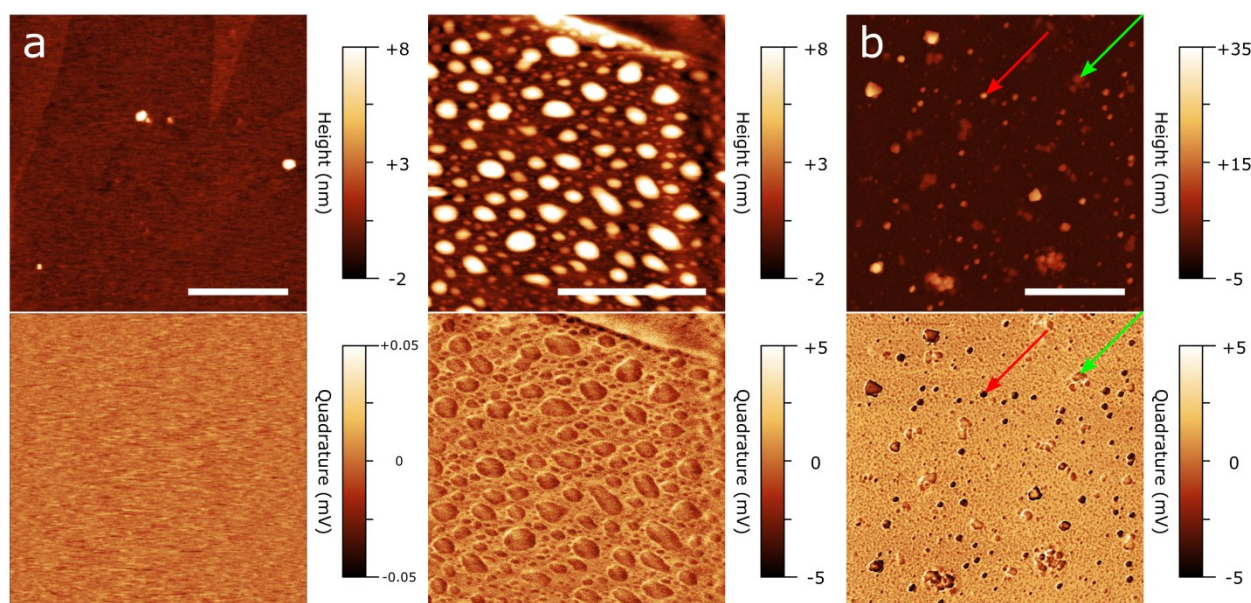

**Figure S3.** (a) Representative AFM topography (top row) and peakforce quadrature (bottom row) of 2D BP immediately after cleavage (left column) and after being exposed to air for 1h (right column). Oxidation leads to the formation of raised ‘bubbles’ which have markedly different mechanical characteristics wrt pristine BP. Scale bar = 500 nm. (b) AFM topography (top) and peakforce quadrature (bottom) of a 2D BP flake decorated with Au nanoclusters after several hours of AFM imaging under a gentle nitrogen flow. This zone is partially contaminated with solvent/inert gas impurities, and is beginning to show local oxidation. Nevertheless, Au clusters (e.g. red arrow) are still easily told apart from other features with similar morphology (e.g. green arrow) on the basis of their lower quadrature signal. Scale bar = 500 nm.

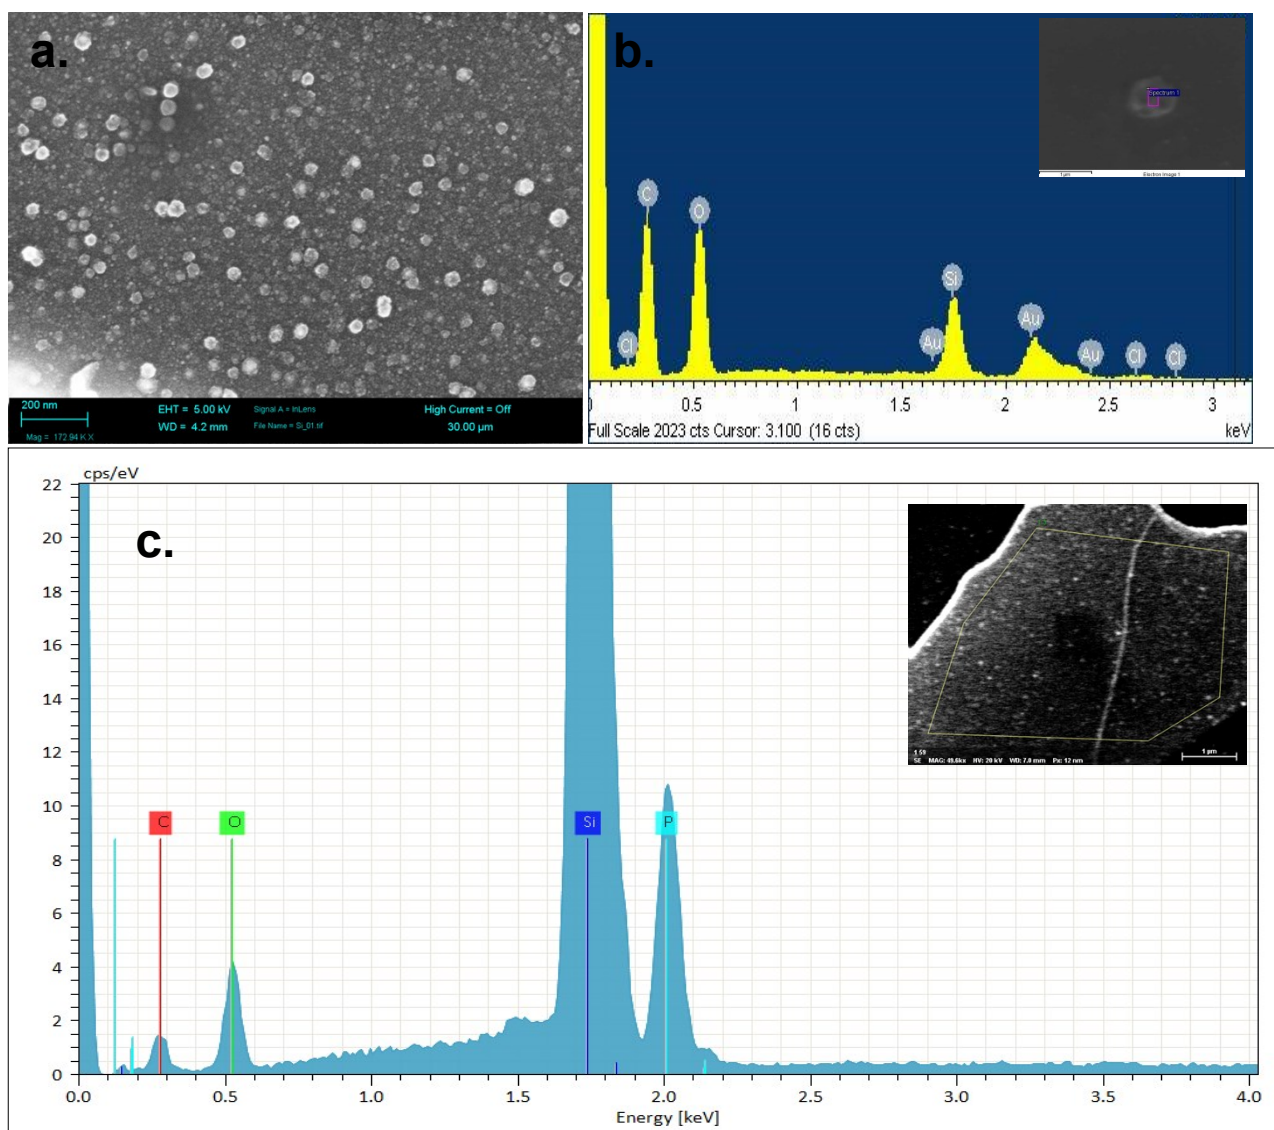

**Figure S4.** SEM images and relative EDX analysis on a Si/SiO<sub>2</sub>/2D bP sample functionalized with gold NPs during 18h of reaction. (a) SEM image where gold NPs are visible as bright spots and spread all over the surface of the 2D bP flake (b) elemental analysis through EDX spectrum of a micrometric Au NPs adsorbed on the Si/SiO<sub>2</sub> substrate; (c) elemental analysis through EDX spectrum of an area of a 2D bP flake covered with Au NPs; the typical signal from Au is not evidenced here due to its relative low content (<1%).

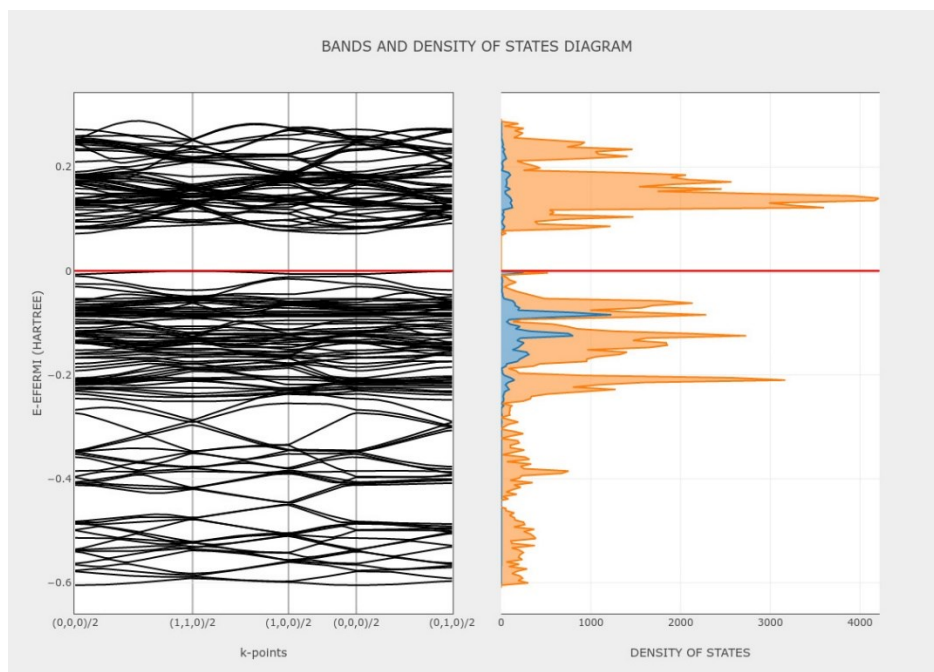

**Figure S5.** Band and DOS structures of the heterostructure of phosphorene and a  $\text{Au}_2$  moiety. The contribution from gold in blue falls in between the valence and conducting bands with a consequent narrowing of band gap.

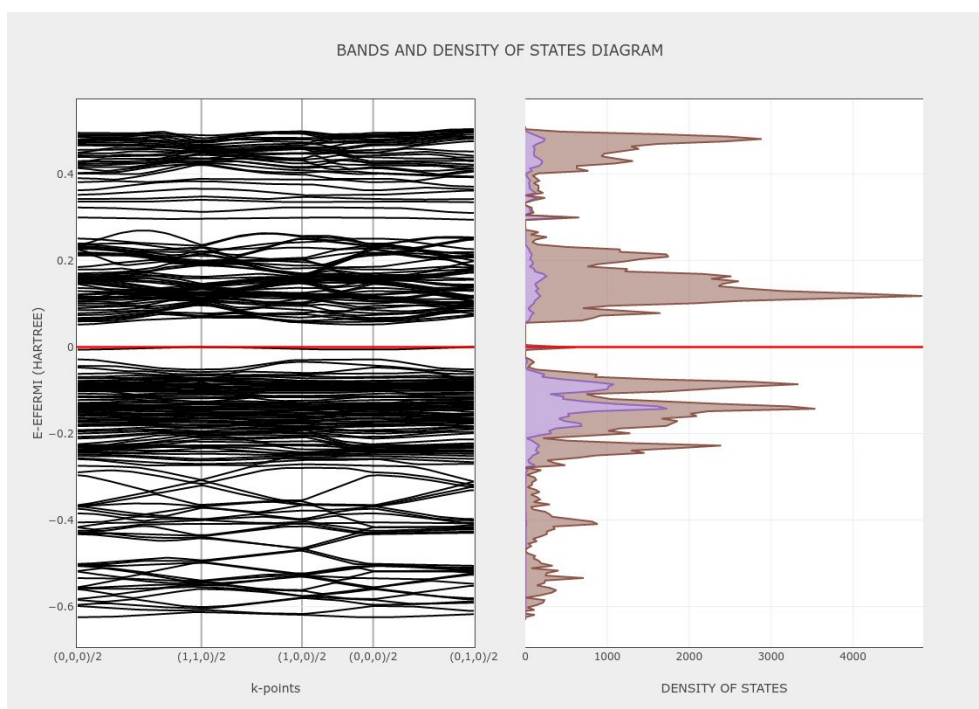

**Figure S6.** Band and DOS structures of the heterostructure of phosphorene and a  $\text{Au}_4$  moiety. The contribution from gold in violet falls in between the valence and conducting bands with a consequent narrowing of band gap.

# List of Coordinates and Energy parameters of Optimized Structures

## Phosphorene, supercell of 32 atoms

### Structural parameters

CELL 13.4084 9.4218 89.9991

P 0.125014 0.048968 1.094693

P 0.000011 0.207071 1.095026

P -0.000001 0.298947 -1.024510

P 0.125021 0.456998 -1.026356

P -0.124988 0.048976 1.094462

P 0.250011 0.207063 1.094954

P 0.250054 0.298941 -1.024543

P -0.124981 0.457068 -1.024263

P 0.125029 -0.451082 1.093039

P 0.000062 -0.292969 1.094767

P 0.000026 -0.201024 -1.024559

P 0.125025 -0.042950 -1.024729

P -0.124970 -0.451025 1.095204

P 0.250008 -0.292971 1.094798

P 0.250019 -0.201026 -1.024545

P -0.124972 -0.042944 -1.024965

P -0.374984 0.048961 1.094466

P -0.499982 0.207050 1.094576

P -0.499978 0.298968 -1.024819

P -0.374991 0.457072 -1.024407

P 0.375006 0.048964 1.094573

P -0.249989 0.207056 1.094578

P -0.249984 0.299002 -1.024763

P 0.375012 0.457059 -1.024325

P -0.374972 -0.451025 1.095061

P -0.499978 -0.292927 1.094727

P -0.499980 -0.201032 -1.024807

P -0.374976 -0.042947 -1.025010

P 0.375038 -0.451037 1.095155

P -0.249978 -0.292922 1.094634

P -0.249958 -0.201039 -1.024929

P 0.375026 -0.042941 -1.024886

Energy -10922.3367839 AU/CELL

## Phosphorene with one gold atom

### Structural parameters

CELL 13.39372594 9.55786828 89.999627



P 1.250236441839E-01 6.960022737075E-02 1.044869652918E+00  
P -3.808682116868E-03 2.190658109243E-01 1.089258627397E+00  
P -1.130580563399E-03 3.026844522494E-01 -1.040849578717E+00  
P 1.250216452365E-01 4.581371937772E-01 -1.028672144265E+00  
P -1.242894968668E-01 5.330448710344E-02 1.129598213450E+00  
P 2.538549268754E-01 2.190679268408E-01 1.089320440973E+00  
P 2.511764002959E-01 3.026865529854E-01 -1.040820903347E+00  
P -1.285684215782E-01 4.559716417149E-01 -1.060695721786E+00  
P 1.250223839398E-01 -4.565086540142E-01 1.104039276921E+00  
P 2.412683254050E-03 -2.967067532424E-01 1.180946824034E+00  
P 1.344049291881E-03 -1.984772920828E-01 -9.180161695524E-01  
P 1.250202486879E-01 -4.069161976372E-02 -1.016537042161E+00  
P -1.272590554680E-01 -4.577366219743E-01 1.060417920572E+00  
P 2.476295303463E-01 -2.967039785150E-01 1.180958403358E+00  
P 2.486990078826E-01 -1.984723687745E-01 -9.179928890088E-01  
P -1.245830817342E-01 -4.454603028594E-02 -9.540566012173E-01  
P -3.749770967178E-01 4.884227293511E-02 1.106226803143E+00  
P -4.991026627534E-01 2.066820296553E-01 1.085522515507E+00  
P -4.988571260098E-01 2.938952964842E-01 -1.053705565054E+00  
P -3.749780931992E-01 4.513926648882E-01 -1.044132472439E+00  
P 3.743358827289E-01 5.330499631502E-02 1.129595926997E+00  
P -2.508525434649E-01 2.066815399926E-01 1.085508659635E+00  
P -2.510995003405E-01 2.938916740583E-01 -1.053724991974E+00  
P 3.786113103151E-01 4.559757321584E-01 -1.060705124982E+00  
P -3.749780587217E-01 -4.540487993084E-01 1.077675704011E+00  
P 4.997656019820E-01 -2.990754008242E-01 1.102708936887E+00  
P 4.992490040075E-01 -2.017797673058E-01 -9.870430549456E-01  
P -3.749779084802E-01 -4.597122636339E-02 -9.937556051221E-01  
P 3.773015496557E-01 -4.577291261478E-01 1.060403328621E+00  
P -2.497217440028E-01 -2.990778379703E-01 1.102726039993E+00  
P -2.492050112055E-01 -2.017818544008E-01 -9.870265815394E-01  
P 3.746257974311E-01 -4.454268245465E-02 -9.540681812515E-01  
Au 1.249953971085E-01 -1.345344860252E-01 2.368225352949E+00

**Energy** -11057.660457649 AU/CELL

### **Phosphorene with two gold atoms parallel to the channel (Figure 6a in the text)**

#### **Structural parameters**

CELL 13.38295710 9.68648254 90.022004

P 1.257112060372E-01 6.955488997194E-02 1.102071363479E+00  
P 2.388297213415E-05 2.263286833989E-01 1.141827706132E+00  
P 8.346912797902E-06 3.048088137532E-01 -9.927927566606E-01  
P 1.279603648023E-01 4.561828331431E-01 -1.021572031758E+00  
P -1.257350149849E-01 6.964747735129E-02 1.102847219437E+00

P 2.546973599648E-01 2.158486551063E-01 1.082308205675E+00  
P 2.510416266342E-01 2.969084464422E-01 -1.067986694266E+00  
P -1.277419781810E-01 4.564041392895E-01 -1.019713247008E+00  
P 1.291053871211E-01 -4.601062944069E-01 1.097041358196E+00  
P -2.114010403052E-06 -2.955713336840E-01 1.299706330827E+00  
P -7.542884365770E-05 -1.963541219748E-01 -8.022670185380E-01  
P 1.245757699657E-01 -4.205611696473E-02 -9.412658493853E-01  
P -1.290065903296E-01 -4.597404530832E-01 1.099853509869E+00  
P 2.498804200862E-01 -2.996670383593E-01 1.175822986990E+00  
P 2.483218030498E-01 -1.982128525323E-01 -9.082799912693E-01  
P -1.245991903370E-01 -4.196675377939E-02 -9.406525994579E-01  
P -3.748326160987E-01 5.286422092217E-02 1.119117771588E+00  
P -4.999793594539E-01 2.063661504598E-01 1.071420367486E+00  
P -4.999517447245E-01 2.911063890215E-01 -1.079698750491E+00  
P -3.769738849874E-01 4.494942885511E-01 -1.101242406576E+00  
P 3.748331315483E-01 5.278143763597E-02 1.118659607173E+00  
P -2.546393357867E-01 2.159830526744E-01 1.083468497001E+00  
P -2.509479329503E-01 2.972536308599E-01 -1.066039535725E+00  
P 3.770388772431E-01 4.493038387488E-01 -1.101718746745E+00  
P -3.754594046079E-01 -4.582633487692E-01 1.008562184704E+00  
P 4.999593551465E-01 -3.050887273476E-01 1.064127644918E+00  
P 4.999845959468E-01 -2.003767485074E-01 -9.882238660221E-01  
P -3.744863708798E-01 -4.602556046229E-02 -9.590496818712E-01  
P 3.753628169307E-01 -4.583681187006E-01 1.008251146412E+00  
P -2.499213851643E-01 -2.995256569207E-01 1.177287440996E+00  
P -2.483773015852E-01 -1.981701142462E-01 -9.070889442459E-01  
P 3.745126924701E-01 -4.606115900846E-02 -9.595990780587E-01  
Au 1.160634473757E-01 -1.380569205845E-01 2.378655114358E+00  
Au -1.155514312821E-01 -1.379256279987E-01 2.380262742839E+00

Energy -11193.01327626 AU/CELL

### Phosphorene with two gold atoms over the channel (Figure 6b in the text)

#### Structural parameters

CELL 13.40868591 9.48997962 90.000747  
P 1.249972931988E-01 6.440545114373E-02 1.022828104588E+00  
P -3.772199787055E-03 2.132365824383E-01 1.090913751815E+00  
P 2.362430726518E-03 3.029269561080E-01 -1.037645518623E+00  
P 1.250057791857E-01 4.622570459590E-01 -9.433591096072E-01  
P -1.249039396849E-01 4.901162601588E-02 1.104478655966E+00  
P 2.537758178314E-01 2.132245319200E-01 1.091019306961E+00  
P 2.476401741455E-01 3.029186445389E-01 -1.037566190585E+00  
P -1.261636197706E-01 4.539065752109E-01 -1.079464728207E+00  
P 1.250087818501E-01 -4.457318763998E-01 1.307287114514E+00  
P -4.712251541618E-03 -2.927061568555E-01 1.174249150887E+00  
P 9.958481675746E-04 -2.041406574211E-01 -9.724730809461E-01

P 1.250039689889E-01 -4.694820176820E-02 -1.034412365277E+00  
P -1.264734887393E-01 -4.564243874834E-01 1.030273215796E+00  
P 2.547260693501E-01 -2.927040680132E-01 1.174192685103E+00  
P 2.490073884913E-01 -2.041424610506E-01 -9.728459979553E-01  
P -1.236179010387E-01 -4.604139034027E-02 -1.004209711370E+00  
P -3.749981004537E-01 4.717696866265E-02 1.076840273954E+00  
P -4.994576029183E-01 2.050231432100E-01 1.065891903656E+00  
P 4.998596661440E-01 2.939293268112E-01 -1.067178200409E+00  
P -3.749992070923E-01 4.509696395085E-01 -1.075311206257E+00  
P 3.749046647709E-01 4.899883810774E-02 1.104468977383E+00  
P -2.505406389803E-01 2.050305739420E-01 1.065940480635E+00  
P -2.498576841018E-01 2.939356276040E-01 -1.067127675340E+00  
P 3.761677589893E-01 4.539002817495E-01 -1.079365786595E+00  
P -3.749971244741E-01 -4.556096188666E-01 1.041468695213E+00  
P -4.995516596637E-01 -2.991976587039E-01 1.068429689808E+00  
P 4.994812480861E-01 -2.020285232301E-01 -1.026258998734E+00  
P -3.749976725619E-01 -4.550460062078E-02 -1.032080273478E+00  
P 3.764787509475E-01 -4.564316554874E-01 1.030361446967E+00  
P -2.504429990542E-01 -2.991925650085E-01 1.068418727561E+00  
P -2.494785394046E-01 -2.020268973221E-01 -1.026264336038E+00  
P 3.736236910921E-01 -4.604281637114E-02 -1.004297275549E+00  
Au 1.250297052198E-01 -1.041430360356E-01 2.656285171023E+00  
Au 1.251955920813E-01 -3.377352419521E-01 3.865713103141E+00

Energy -11193.03924027 AU/CELL

### Phosphorene with four gold atoms

#### Structural parameters

CELL 13.40268910 9.48211116 90.437818  
P 1.118275872495E-01 6.207551921147E-02 1.188194940760E+00  
P -1.267524142705E-02 2.205017879102E-01 1.221943245336E+00  
P -7.862069710170E-03 3.075673549163E-01 -9.187958863663E-01  
P 1.171077614259E-01 4.659992826666E-01 -9.334258094771E-01  
P -1.349606323286E-01 5.666108021239E-02 1.180090495719E+00  
P 2.424319746631E-01 2.098617342443E-01 1.158952773470E+00  
P 2.395838706619E-01 3.057629897558E-01 -9.474763084305E-01  
P -1.341664177212E-01 4.615206554731E-01 -9.801992378408E-01  
P 1.166692019219E-01 -4.394056742470E-01 1.207650397666E+00  
P -9.764623813792E-03 -2.830817171000E-01 1.189329986913E+00  
P -8.667492021925E-03 -1.919475399277E-01 -9.369267923484E-01  
P 1.166725327921E-01 -3.499313850030E-02 -9.873935927209E-01  
P -1.342884420891E-01 -4.446720952205E-01 1.114869876600E+00  
P 2.464001988277E-01 -2.842903964387E-01 1.210062441872E+00  
P 2.378992901806E-01 -1.913040757818E-01 -1.049983192325E+00  
P -1.332460314632E-01 -3.479866550798E-02 -9.449259163012E-01  
P -3.841831098379E-01 5.256690599839E-02 1.167390759220E+00  
P 4.912062440299E-01 2.091936739550E-01 1.168051385701E+00  
P 4.918305420805E-01 2.970594551501E-01 -9.682544656367E-01



P -3.839981237176E-01 4.572166076736E-01 -9.801907446032E-01  
P 3.657504054715E-01 4.995129080987E-02 1.190019031195E+00  
P -2.598711801568E-01 2.122967516977E-01 1.167996956269E+00  
P -2.588956672984E-01 3.019279196012E-01 -9.611693141148E-01  
P 3.685800581908E-01 4.569343703367E-01 -9.457726242043E-01  
P -3.843528794920E-01 -4.453120950597E-01 1.119459909012E+00  
P 4.909351967965E-01 -2.901310820270E-01 1.119733416841E+00  
P 4.890523411790E-01 -1.927888018512E-01 -9.768351003427E-01  
P -3.841445684652E-01 -3.670785061214E-02 -9.576107397274E-01  
P 3.690810273835E-01 -4.523823042524E-01 1.151547654430E+00  
P -2.587105042288E-01 -2.888652713407E-01 1.127855105862E+00  
P -2.588854949834E-01 -1.927636613788E-01 -9.681194285638E-01  
P 3.640834529668E-01 -3.566071625250E-02 -9.732720626672E-01  
Au 1.350741430753E-01 -1.189159545765E-01 2.790263288736E+00  
Au 1.977031676525E-01 -3.509849971002E-01 3.817054864747E+00  
Au 2.496424290206E-01 3.662074632758E-01 2.928031611039E+00  
Au 2.664410531853E-01 4.503011942867E-01 5.348753074282E+00

**Energy** -11463.784640832 AU/CELL
